# Supplementary material for: Coke-free operation of an all porous solid oxide fuel cell (AP-SOFC) used as an O2 supply device
Source: Royal Society of Chemistry journal article supplement (doi:10.1039/c4ta05009f), 2014-12-06
Supplement: c4ta05009f1.pdf [file c4ta05009f1.pdf]

## Supporting Information

### **Coke free operation of an all porous solid oxide fuel cell (AP-SOFC) used as an O<sub>2</sub> supply device**

Y.M. Guo,<sup>a,b</sup> G. Largiller,<sup>c</sup> C. Guizard,<sup>d</sup> C. Tardivat<sup>d</sup> and D. Farrusseng<sup>\*a</sup>

*a* Institut de Recherches sur la Catalyse et l'Environnement de Lyon (IRCELYON), University Lyon 1,  
CNRS; 2, avenue Albert Einstein, 69626 Villeurbanne, France.

*b* School of Physics and Materials Science, Anhui University, Hefei 230601, P.R. China

*c* CEA, LITEN/DTNM/SERE, Laboratoire Recyclage et Valorisation des Matériaux ; 17 avenue des  
Martyrs, 38000 Grenoble, France.

*d* Laboratoire de Synthèse et Fonctionnalisations des Céramiques, UMR 3080 CNRS/Saint-Gobain,  
84306 Cavaillon, France.

**Table S1 The calculated viscous flow and Knudsen diffusion by the equation as functions of differential pressure at 700 °C.**

| $\Delta P$<br>(bar) | $\Pi_v (\times 10^6)$ | $\Pi_k (\times 10^6)$ | $\Pi (\times 10^6)$ | $\Pi_k/\Pi$<br>(%) |
|---------------------|-----------------------|-----------------------|---------------------|--------------------|
| 0.02                | 0.09                  | 9.59                  | 9.68                | 99.04              |
| 0.05                | 0.22                  | 9.59                  | 9.81                | 97.74              |
| 0.09                | 0.43                  | 9.59                  | 10.02               | 95.75              |
| 0.16                | 0.72                  | 9.59                  | 10.31               | 93.00              |
| 0.25                | 1.17                  | 9.59                  | 10.76               | 89.15              |
| 0.32                | 1.48                  | 9.59                  | 11.07               | 86.62              |
| 0.46                | 2.13                  | 9.59                  | 11.72               | 81.83              |
| 0.70                | 3.24                  | 9.59                  | 12.83               | 74.74              |
| 0.79                | 3.67                  | 9.59                  | 13.26               | 72.31              |
| 0.91                | 4.19                  | 9.59                  | 13.78               | 69.59              |

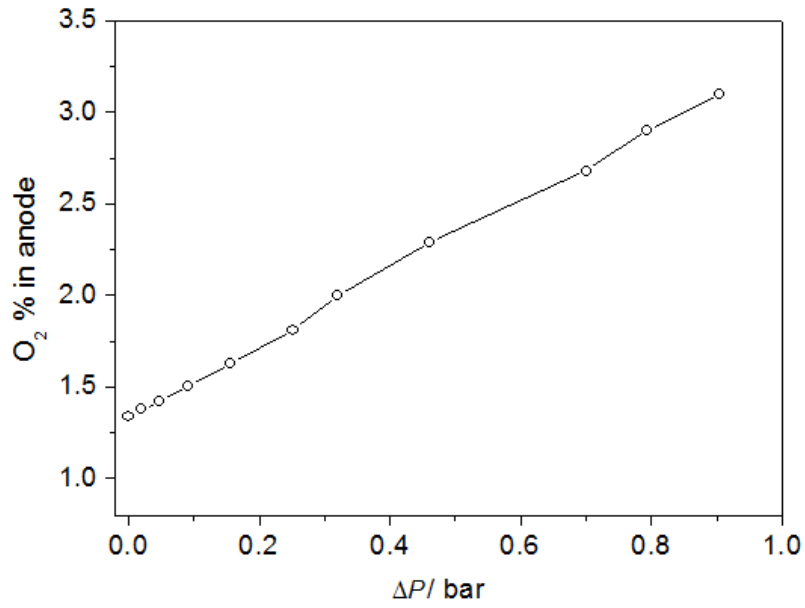

Fig. S1 The oxygen concentration in the anode as functions of differential pressure through the CGO electrolyte at 700 °C.

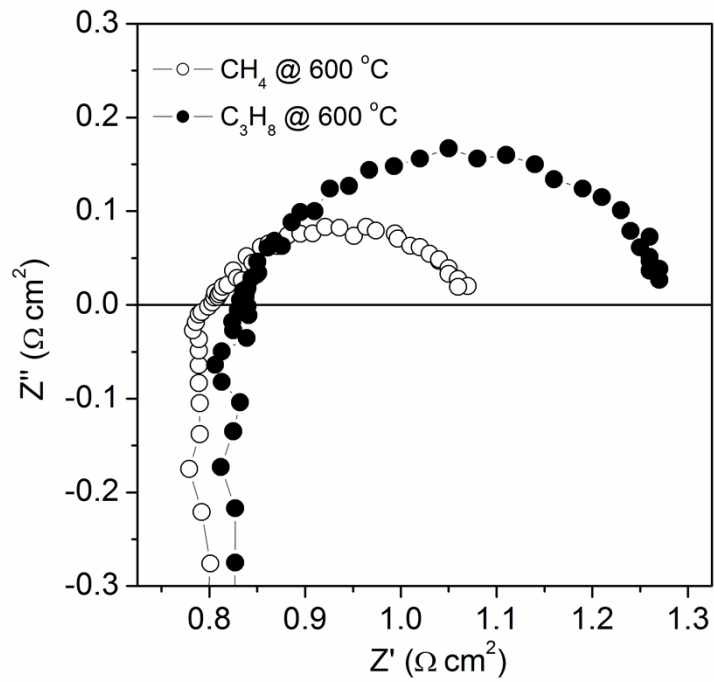

Fig. S2 Nyquist plots of AP-SOFC operating in CH<sub>4</sub> and C<sub>3</sub>H<sub>8</sub> at 600 °C.

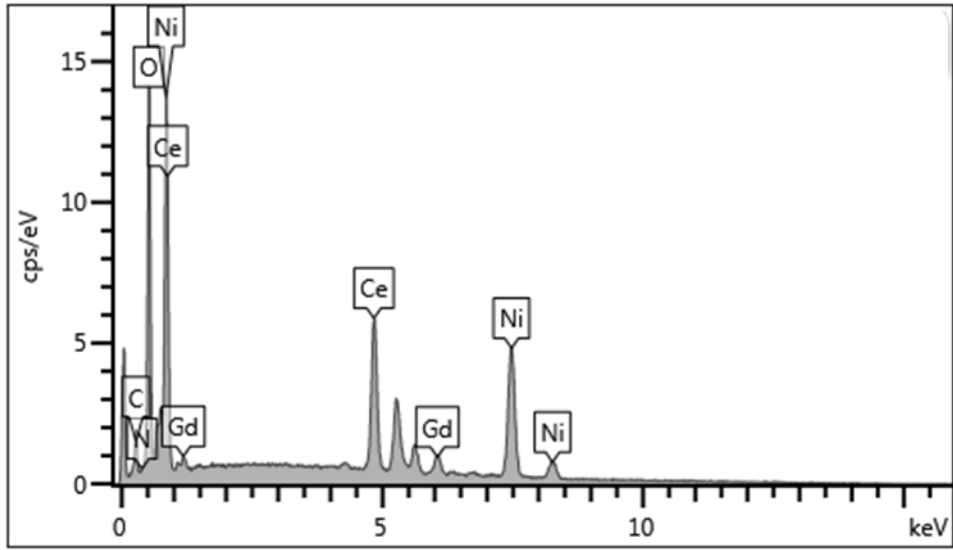

Fig. S3 EDX spectra for the anode of the tested AP-SOFC.
